# Supplementary material
Source: Springer Nature journal article supplement (https://www.springermedizin.de/resource/supplementary/12882_2013_916_MOESM1_ESM.pdf/9454384)
Supplement: MOESM1 [file 9454384]

Dialysis patients  
- For at least 3 months  
- PTH<sup>a</sup> < 500 ng/L  
[REIN registry – region of Lorraine,  
From 1<sup>st</sup>, December 2009 to 31<sup>st</sup>, May 2012]  
(N=2137)

Included (N=305)

PTH ≥ 500 ng/L (N=261)

Cinacalcet (N=44)

Eligible on 31st, May 2012  
(N=823)

Not included (N=1009)

Death (N=424)

Transplantation (N=103)

Dialysis stop (N=28)

Dialysis out of Lorraine (N=32)

Cinacalcet in the first 3 months  
of dialysis (N=48)

History of parathyroidectomy (N=54)

Previous cinacalcet treatment before  
dialysis (N=56)

History of PTH ≥ 500 ng/L (N=157)

Other reasons (N=6)
